# Supplementary material for: Monitoring Cutaneous Leishmaniasis Lesions in Mice Undergoing Topical Miltefosine Treatment
Source: MDPI journal article supplement (doi:10.3390/scipharm91040054), 2023-11-09
Supplement: s1 [file s1]

**Figure S1.** Identification of *Leishmania* species in this study using (a) HSP70-PCR. (b) ITS1-PCR. DNA was isolated from promastigotes culture samples. amplified by HSP70-PCR. ITS1-PCR and digested with HaeIII. RFLP patterns of reference strains can be seen in lanes 2-5. Lane 2. *L. (L.) amazonensis*; Lane 3. *L. (V.) braziliensis*; Lane 4. *L. (V.) guyanensis*; Lane 5. *L. infantum*. Lane 6-9. The restriction pattern corresponded to the *L. (L.)amazonensis*. For lanes 1 and 10, a molecular size marker1 kb ladder was used.

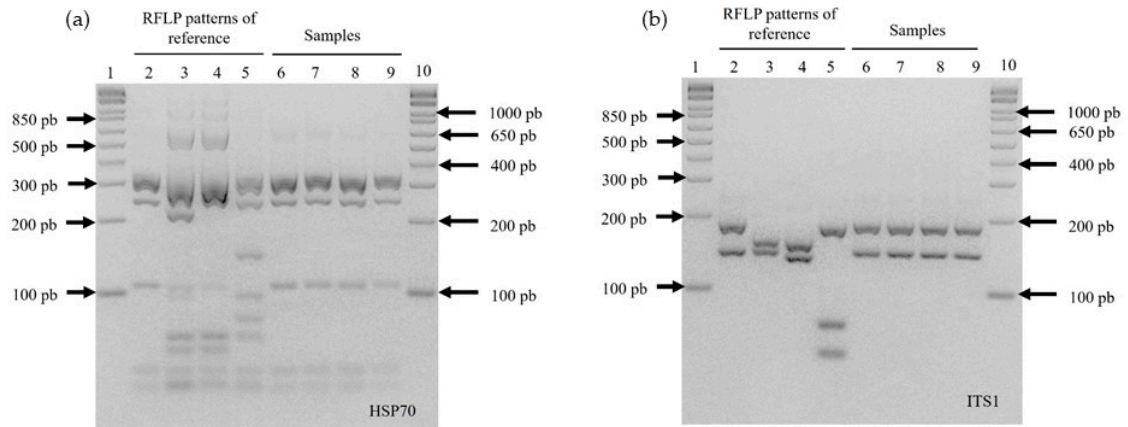

**Table S1.** Characteristics and intensity of the histopathological variables studied in lesions from mice with CL treated topically with 0.5%MTF-hydrogel. The table shows the intensity [(-): absence. +(1-15/field): mild. ++(16-30/field): moderate. +++(>30/field): severe] of the variables found in the epidermis and dermis at 0-. 12-. 25- and 60-days p.t. Observation in 50 microscopic fields. magnification of 1000x.. Chi-square test ( $p > 0.05$ ).

|                              | D <sub>0</sub><br>n = 6 (%) |         |         |        | D <sub>12</sub><br>n = 6 (%) |         |         |         | D <sub>25</sub><br>n = 6 (%) |         |         |         | p.t.<br>n = 6 (%) |         |         |         | q     |
|------------------------------|-----------------------------|---------|---------|--------|------------------------------|---------|---------|---------|------------------------------|---------|---------|---------|-------------------|---------|---------|---------|-------|
| <b>Epidermis</b>             | (+++)                       | (++)    | (+)     | (-)    | (+++)                        | (++)    | (+)     | (-)     | (+++)                        | (++)    | (+)     | (-)     | (+++)             | (++)    | (+)     | (-)     |       |
| Acanthosis                   | 6(100)                      | 0       | 0       | 0      | 1(16.7)                      | 4(66.7) | 1(16.7) | 0       | 0                            | 1(16.7) | 5(83.3) | 0       | 2(33.3)           | 0       | 2(33.3) | 2(33.3) | 0.003 |
| Spongiosis                   | 6(100)                      | 0       | 0       | 0      | 1(16.7)                      | 3(50)   | 1(16.7) | 1(16.7) | 0                            | 1(16.7) | 2(33.3) | 3(50)   | 0                 | 1(16.7) | 1(16.7) | 4(66.7) | 0.003 |
| Hypergranulosis              | 0                           | 5(83.3) | 1(16.7) | 0      | 3(50)                        | 1(16.7) | 2(33.3) | 0       | 3(50)                        | 1(16.7) | 2(33.3) | 0       | 0                 | 0       | 2(33.3) | 4(66.7) | 0.001 |
| Hyperkeratosis               | 3(50)                       | 3(50)   | 0       | 0      | 0                            | 4(66.7) | 2(33.3) | 0       | 1(16.7)                      | 4(66.7) | 1(16.7) | 0       | 0                 | 0       | 3(50)   | 3(50)   | 0.008 |
| Parakeratosis                | 3(50)                       | 1(16.7) | 2(33.3) | 0      | 1(16.7)                      | 2(33.3) | 3(50)   | 0       | 0                            | 3(50)   | 3(50)   | 0       | 0                 | 0       | 2(33.3) | 4(66.7) | 0.001 |
| Papillomatosis               | 0                           | 0       | 0       | 6(100) | 0                            | 2(33.3) | 1(16.7) | 3(50)   | 0                            | 2(33.3) | 4(66.7) | 0       | 0                 | 0       | 1(16.7) | 5(83.3) |       |
| R.K                          | 6(100)                      | 0       | 0       | 0      | 6(100)                       | 0       | 0       | 0       | 2(33.3)                      | 2(33.3) | 2(33.3) | 0       | 2(33.3)           | 0       | 3(50)   | 1(16.7) | 0.030 |
| <b>Dermis</b>                | (+++)                       | (++)    | (+)     | (-)    | (+++)                        | (++)    | (+)     | (-)     | (+++)                        | (++)    | (+)     | (-)     | (+++)             | (++)    | (+)     | (-)     |       |
| Fibrosis                     | 3(50)                       | 3(50)   | 0       | 0      | 4(66.7)                      | 2(33.3) | 0       | 0       | 3(50)                        | 2(33.3) | 0       | 1(16.7) | 2(33.3)           | 0       | 2(33.3) | 2(33.3) | N.s   |
| Angiogénesis                 | 3(50)                       | 1(16.7) | 2(33.3) | 0      | 3(50)                        | 2(33.3) | 1(16.7) | 0       | 0                            | 2(33.3) | 1(16.7) | 3(50)   | 0                 | 1(16.7) | 2(33.3) | 3(50)   | N.s   |
| DII                          | 6(100)                      | 0       | 0       | 0      | 6(100)                       | 0       | 0       | 0       | 2(33.3)                      | 0       | 4(66.7) | 0       | 2(33.3)           | 0       | 4(66.7) | 0       | 0.007 |
| Necrosis                     | 3(50)                       | 2(33.3) | 1(16.7) | 0      | 2(33.3)                      | 1(16.7) | 2(33.3) | 1(16.7) | 0                            | 0       | 3(50)   | 3(50)   | 0                 | 1(16.7) | 1(16.7) | 4(66.7) | N.s   |
| <b>Cellular predominance</b> |                             |         |         |        |                              |         |         |         |                              |         |         |         |                   |         |         |         |       |
| Lymphocytes                  | 6(100)                      | 0       | 0       | 0      | 6(100)                       | 0       | 0       | 0       | 5(83.3)                      | 0       | 1(16.7) | 0       | 2(33.3)           | 1(16.7) | 3(50)   | 0       |       |
| Plasma cells                 | 6(100)                      | 0       | 0       | 0      | 2(33.3)                      | 4(66.7) | 0       | 0       | 1(16.7)                      | 2(33.3) | 3(50)   | 0       | 2(33.3)           | 1(16.7) | 2(33.3) | 1(16.7) | 0.02  |
| PMN                          | 0                           | 0       | 3(50)   | 3(50)  | 0                            | 0       | 6(100)  | 0       | 0                            | 0       | 3(50)   | 3(50)   | 0                 | 0       | 2(33.3) | 4(66.7) |       |
| macrophages                  | 6(100)                      | 0       | 0       | 0      | 5(83.3)                      | 1(16.7) | 0       | 0       | 4(66.7)                      | 0       | 2(33.3) | 0       | 1(16.7)           | 3(50)   | 1(16.7) | 1(16.7) | 0.01  |
| Giant cells                  | 0                           | 0       | 0       | 6(100) | 0                            | 2(33.3) | 4(66.7) | 0       | 0                            | 0       | 4(66.7) | 2(33.3) | 0                 | 0       | 1(16.7) | 5(83.3) |       |
| Mast cells                   | 0                           | 0       | 0       | 6(100) | 0                            | 1(16.7) | 3(50)   | 2(33.3) | 0                            | 5(83.3) | 1(16.7) | 0       | 0                 | 6(100)  | 0       | 0       | 0.002 |
| Granuloma                    | 0                           | 0       | 0       | 6(100) | 0                            | 0       | 1(16.7) | 5(83.3) | 0                            | 0       | 4(66.7) | 2(33.3) | 0                 | 0       | 2(33.3) | 4(66.7) | 0.02  |
| Amastigotes                  | 6(100)                      | 0       | 0       | 0      | 0                            | 2(33.3) | 3(50)   | 1(16.7) | 0                            | 0       | 3(50)   | 3(50)   | 0                 | 1(16.7) | 2(33.3) | 3(50)   | 0.001 |

n: number of mice; R.K: Reactive keratinocytes ; DII: Diffuse inflammatory infiltrate; PMN: polymorphonuclear ; N.s: Not significant

**Table S2.** Characteristics and intensity of the histopathological variables studied in lesions of mice with CL treated topically with the vehicle (without MTF). The table shows the intensity [(-): absence. +(1-15/field): mild. ++(16-30/field): moderate. +++(>30/field): severe] of the variables found in the epidermis and dermis at 0-, 12-, 25- and 60-days p.t. Observation in 50 microscopic fields. 1000x magnification. Chi-square test ( $p > 0.05$ ).

|                              | D <sub>0</sub><br><i>n</i> = 4 (%) |       |       |        | D <sub>12</sub><br><i>n</i> = 2 (%) |       |       |        | D <sub>25</sub><br><i>n</i> = 2 (%) |       |        |        | p.t.<br><i>n</i> = 2 (%) |        |        |        |
|------------------------------|------------------------------------|-------|-------|--------|-------------------------------------|-------|-------|--------|-------------------------------------|-------|--------|--------|--------------------------|--------|--------|--------|
| Epidermis                    | (+++)                              | (++)  | (+)   | (-)    | (+++)                               | (++)  | (+)   | (-)    | (+++)                               | (++)  | (+)    | (-)    | (+++)                    | (++)   | (+)    | (-)    |
| Acanthosis                   | 3(75)                              | 1(25) | 0     | 0      | 2(100)                              | 0     | 0     | 0      | 2(100)                              | 0     | 0      | 0      | 2(100)                   | 0      | 0      | 0      |
| Spongiosis                   | 3(75)                              | 0     | 1(25) | 0      | 2(100)                              | 0     | 0     | 0      | 1(50)                               | 0     | 1(50)  | 0      | 1(50)                    | 1(50)  | 0      | 0      |
| Hypergranulosis              | 0                                  | 1(25) | 3(75) | 0      | 0                                   | 1(50) | 1(50) | 0      | 1(50)                               | 1(50) | 0      | 0      | 0                        | 2(100) | 0      | 0      |
| Hyperkeratosis               | 1(25)                              | 3(75) | 0     | 0      | 2(100)                              | 0     | 0     | 0      | 2(100)                              | 0     | 0      | 0      | 1(50)                    | 0      | 1(50)  | 0      |
| Parakeratosis                | 1(25)                              | 0     | 3(75) | 0      | 1(50)                               | 1(50) |       |        | 0                                   | 0     | 2(100) | 0      | 1(50)                    | 0      | 1(50)  | 0      |
| Papillomatosis               | 0                                  | 0     | 0     | 4(100) | 0                                   | 0     | 1(50) | 1(50)  | 0                                   | 0     | 0      | 2(100) | 0                        | 0      | 0      | 2(100) |
| R.K                          | 4(100)                             | 0     | 0     | 0      | 2(100)                              | 0     | 0     | 0      | 2(100)                              | 0     | 0      | 0      | 2(100)                   | 0      | 0      | 0      |
| Dermis                       | (+++)                              | (++)  | (+)   | (-)    | (+++)                               | (++)  | (+)   | (-)    | (+++)                               | (++)  | (+)    | (-)    | (+++)                    | (++)   | (+)    | (-)    |
| Fibrosis                     | 1(25)                              | 1(25) | 2(50) | 0      | 2(100)                              | 0     | 0     | 0      | 1(50)                               | 1(50) | 0      | 0      | 1(50)                    | 1(50)  | 0      | 0      |
| Angiogénesis                 | 3(75)                              | 0     | 1(25) | 0      | 2(100)                              | 0     | 0     | 0      | 1(50)                               | 1(50) | 0      | 0      | 1(50)                    | 1(50)  | 0      | 0      |
| DII                          | 4(100)                             | 0     | 0     | 0      | 2(100)                              | 0     | 0     | 0      | 2(100)                              | 0     | 0      | 0      | 2(100)                   | 0      | 0      | 0      |
| Necrosis                     | 2(50)                              | 2(50) | 0     | 0      | 2(100)                              | 0     | 0     | 0      | 2(100)                              | 0     | 0      | 0      | 2(100)                   | 0      | 0      | 0      |
| <b>Cellular predominance</b> |                                    |       |       |        |                                     |       |       |        |                                     |       |        |        |                          |        |        |        |
| Lymphocytes                  | 3(75)                              | 1(25) | 0     | 0      | 2(100)                              | 0     | 0     | 0      | 2(100)                              | 0     | 0      | 0      | 2(100)                   | 0      | 0      | 0      |
| Plasma cells                 | 3(75)                              | 1(25) | 0     | 0      | 1(50)                               | 1(50) | 0     | 0      | 2(100)                              | 0     | 0      | 0      | 1(50)                    | 1(50)  | 0      | 0      |
| PMN                          | 0                                  | 0     | 2(50) | 2(50)  | 2(100)                              | 0     | 0     | 0      | 0                                   | 1(50) | 1(50)  | 0      | 0                        | 0      | 2(100) | 0      |
| Macrophages                  | 4(100)                             | 0     | 0     | 0      | 2(100)                              | 0     | 0     | 0      | 2(100)                              | 0     | 0      | 0      | 2(100)                   | 0      | 0      | 0      |
| Giant cells                  | 0                                  | 0     | 0     | 4(100) | 0                                   | 0     | 0     | 2(100) | 0                                   | 0     | 0      | 2(100) | 0                        | 0      | 0      | 2(100) |
| Mast cells                   | 0                                  | 0     | 0     | 4(100) | 0                                   | 0     | 0     | 2(100) | 0                                   | 0     | 0      | 2(100) | 0                        | 0      | 0      | 2(100) |
| Granuloma                    | 0                                  | 0     | 0     | 4(100) | 0                                   | 0     | 0     | 2(100) | 0                                   | 0     | 0      | 2(100) | 0                        | 0      | 0      | 2(100) |
| Amastigotes                  | 4(100)                             | 0     | 0     | 0      | 2(100)                              | 0     | 0     | 0      | 2(100)                              | 0     | 0      | 0      | 2(100)                   | 0      | 0      | 0      |

R.K: Reactive keratinocytes; DII: Diffuse inflammatory infiltrate; PMN: polymorphonuclear.
